# Supplementary material for: Krill oil protects dopaminergic neurons from age-related degeneration through temporal transcriptome rewiring and suppression of several hallmarks of aging
Source: publisher site journal article supplement (doi:10.18632/aging.204375), 2022-11-09
Supplement: Supplementary file [file aging-v14i21-204375-supplementary-material-SD2.pdf]

## SUPPLEMENTARY TABLE

**Supplementary Table 1. List of PCR primer sequences used in mRNA expression analysis.**

| <b>Gene</b>  | <b>Species</b> | <b>Sequence (5'-3')</b>                                            |
|--------------|----------------|--------------------------------------------------------------------|
| p21          | Human          | Forward: GACACCACTGGAGGGTGACT<br>Reverse: CAGGTCCACATGGTCTTCCT     |
| TGF- $\beta$ | Human          | Forward: TACCTGAACCCGTGTTGCTCTC<br>Reverse: GTTGCTGAGGTATCGCCAGGAA |
